# Supplementary material
Source: MDPI journal article supplement (https://www.mdpi.com/search?q=life-11-00264)
Supplement: s001 [file life-11-00264-s001.pdf]

Table S1. The interobserver agreement between two radiologists of different histogram parameters in both arterial and venous phase for patients with PGIL.

| <b>Parameter</b>   | <b>ICC</b> | <b>95%CI</b>  |
|--------------------|------------|---------------|
| A-mean             | 0.999      | 0.999 - 1.000 |
| A-median           | 0.999      | 0.998 - 0.999 |
| A-5%th percentile  | 0.998      | 0.997 - 0.999 |
| A-10%th percentile | 0.999      | 0.999 - 1.000 |
| A-25%th percentile | 0.999      | 0.999 - 1.000 |
| A-50%th percentile | 0.999      | 0.999 - 1.000 |
| A-75%th percentile | 0.999      | 0.999 - 1.000 |
| A-90%th percentile | 0.999      | 0.998 - 1.000 |
| A-95%th percentile | 0.999      | 0.998 - 0.999 |
| A-skewness         | 0.944      | 0.902 - 0.969 |
| A-kurtosis         | 0.898      | 0.823 - 0.942 |
| A-entropy          | 0.915      | 0.853 - 0.952 |
| V-mean             | 0.998      | 0.997 - 0.999 |
| V-median           | 0.998      | 0.997 - 0.999 |
| V-5%th percentile  | 0.705      | 0.526 - 0.824 |
| V-10%th percentile | 0.715      | 0.540 - 0.830 |
| V-25%th percentile | 0.728      | 0.559 - 0.839 |
| V-50%th percentile | 0.756      | 0.601 - 0.857 |
| V-75%th percentile | 0.805      | 0.675 - 0.886 |
| V-90%th percentile | 0.852      | 0.749 - 0.915 |
| V-95%th percentile | 0.888      | 0.808 - 0.936 |
| V-skewness         | 0.943      | 0.900 - 0.968 |
| V-kurtosis         | 0.980      | 0.965 - 0.989 |
| V-entropy          | 0.982      | 0.968 - 0.990 |

ICC, intraclass correlation coefficient; CI, confidence intervals

Table S2. The interobserver agreement between two radiologists of different histogram parameters in both arterial and venous phase for patients with GIAC.

| <b>Parameter</b>   | <b>ICC</b> | <b>95%CI</b>  |
|--------------------|------------|---------------|
| A-mean             | 0.999      | 0.999 - 1.000 |
| A-median           | 0.999      | 0.998 - 0.999 |
| A-5%th percentile  | 0.998      | 0.997 - 0.999 |
| A-10%th percentile | 0.999      | 0.998 - 0.999 |
| A-25%th percentile | 0.998      | 0.998 - 0.999 |
| A-50%th percentile | 0.999      | 0.998 - 0.999 |
| A-75%th percentile | 0.999      | 0.998 - 0.999 |
| A-90%th percentile | 0.999      | 0.998 - 0.999 |
| A-95%th percentile | 0.999      | 0.998 - 0.999 |
| A-skewness         | 0.909      | 0.857 - 0.942 |
| A-kurtosis         | 0.826      | 0.735 - 0.888 |
| A-entropy          | 0.890      | 0.829 - 0.930 |
| V-mean             | 0.999      | 0.999 - 1.000 |
| V-median           | 0.999      | 0.999 - 0.999 |
| V-5%th percentile  | 0.998      | 0.996 - 0.999 |
| V-10%th percentile | 0.998      | 0.998 - 0.999 |
| V-25%th percentile | 0.999      | 0.998 - 0.999 |
| V-50%th percentile | 0.998      | 0.997 - 0.999 |
| V-75%th percentile | 0.997      | 0.996 - 0.998 |
| V-90%th percentile | 0.996      | 0.995 - 0.997 |
| V-95%th percentile | 0.997      | 0.995 - 0.998 |
| V-skewness         | 0.978      | 0.965 - 0.986 |
| V-kurtosis         | 0.961      | 0.938 - 0.975 |
| V-entropy          | 0.856      | 0.779 - 0.908 |

ICC, intraclass correlation coefficient; CI, confidence intervals
